# Supplementary material
Source: publisher site journal article supplement (https://www.dovepress.com/article/314880)
Supplement: Supplementary file 1 [file get_supplementary_file.php]

**Supplementary Table 1** Gene ontology (GO) enrichment analyses of DEGs

| GO category | GO term | ID | Adjusted P | Count |
| --- | --- | --- | --- | --- |
| BP | Extracellular structure organization | GO:0043062 | 2.53E-06 | 30 |
| BP | Extracellular matrix organization | GO:0030198 | 6.98E-05 | 25 |
| BP | Muscle system process | GO:0003012 | 3.98E-03 | 25 |
| BP | Regulation of neurotransmitter levels | GO:0001505 | 3.61E-04 | 23 |
| BP | Response to toxic substance | GO:0009636 | 4.21E-02 | 23 |
| BP | Regulation of blood circulation | GO:1903522 | 8.43E-04 | 21 |
| BP | Organic anion transport | GO:0015711 | 3.94E-02 | 21 |
| BP | Modulation of chemical synaptic transmission | GO:0050804 | 3.73E-02 | 20 |
| BP | Regulation of trans-synaptic signaling | GO:0099177 | 3.73E-02 | 20 |
| BP | Heart contraction | GO:0060047 | 3.34E-03 | 19 |
| CC | Extracellular matrix | GO:0031012 | 2.98E-17 | 47 |
| CC | Collagen-containing extracellular matrix | GO:0062023 | 3.69E-18 | 45 |
| CC | Endoplasmic reticulum lumen | GO:0005788 | 4.15E-03 | 18 |
| CC | Synaptic membrane | GO:0097060 | 4.11E-02 | 18 |
| CC | Postsynaptic membrane | GO:0045211 | 2.25E-02 | 16 |
| MF | Receptor regulator activity | GO:0030545 | 3.55E-05 | 27 |
| MF | Receptor ligand activity | GO:0048018 | 8.24E-05 | 25 |
| MF | Cation transmembrane transporter activity | GO:0008324 | 4.26E-03 | 24 |
| MF | Extracellular matrix structural constituent | GO:0005201 | 8.75E-09 | 21 |
| MF | Glycosaminoglycan binding | GO:0005539 | 3.43E-07 | 21 |

BP, biological process; CC, cellular component; MF, molecular function; Adjusted P, adjusted P-value; DEGs, differentially expressed genes.

**Supplementary Table 2** KEGG pathway analyses of DEGs

| Pathway | ID | Adjusted P | count |
| --- | --- | --- | --- |
| Neuroactive ligand-receptor interaction | hsa04080 | 7.27E-03 | 20 |
| Cytokine-cytokine receptor interaction | hsa04060 | 1.23E-02 | 17 |
| Phagosome | hsa04145 | 4.72E-02 | 10 |
| Protein digestion and absorption | hsa04974 | 1.86E-02 | 9 |
| Renin-angiotensin system | hsa04614 | 4.72E-02 | 4 |

KEGG, Kyoto Encyclopedia of Genes and Genomes; Adjusted P, adjusted P-value; DEGs, differentially expressed genes.

**Supplementary Table 3** Gene ontology (GO) enrichment analyses of blue module

| GO category | GO term | ID | Adjusted P | Count |
| --- | --- | --- | --- | --- |
| BP | Extracellular matrix organization | GO:0030198 | 9.61E-06 | 13 |
| BP | Extracellular structure organization | GO:0043062 | 2.76E-05 | 13 |
| BP | Transmembrane receptor protein serine/threonine kinase signaling pathway | GO:0007178 | 6.19E-03 | 9 |
| BP | Skeletal system development | GO:0001501 | 4.90E-02 | 9 |
| BP | Cellular response to transforming growth factor beta stimulus | GO:0071560 | 6.19E-03 | 8 |
| BP | Response to transforming growth factor beta | GO:0071559 | 6.19E-03 | 8 |
| BP | Ossification | GO:0001503 | 4.98E-02 | 8 |
| BP | Gliogenesis | GO:0042063 | 4.89E-02 | 7 |
| BP | Transforming growth factor beta receptor signaling pathway | GO:0007179 | 4.48E-02 | 6 |
| BP | Positive regulation of chemotaxis | GO:0050921 | 4.89E-02 | 5 |
| BP | Collagen fibril organization | GO:0030199 | 1.44E-02 | 4 |
| BP | Ovulation cycle | GO:0042698 | 4.70E-02 | 4 |
| BP | Multicellular organismal response to stress | GO:0033555 | 4.89E-02 | 4 |
| BP | Keratan sulfate catabolic process | GO:0042340 | 6.19E-03 | 3 |
| BP | Positive regulation of oligodendrocyte differentiation | GO:0048714 | 3.10E-02 | 3 |
| CC | Extracellular matrix | GO:0031012 | 1.52E-17 | 25 |
| CC | Collagen-containing extracellular matrix | GO:0062023 | 1.15E-17 | 24 |
| CC | Collagen trimer | GO:0005581 | 5.79E-10 | 10 |
| CC | Endoplasmic reticulum lumen | GO:0005788 | 5.23E-04 | 9 |
| CC | Basement membrane | GO:0005604 | 1.89E-04 | 6 |
| MF | Extracellular matrix structural constituent | GO:0005201 | 1.08E-13 | 15 |
| MF | Receptor regulator activity | GO:0030545 | 3.30E-03 | 9 |
| MF | Glycosaminoglycan binding | GO:0005539 | 1.90E-04 | 8 |
| MF | Receptor ligand activity | GO:0048018 | 8.89E-03 | 8 |
| MF | Heparin binding | GO:0008201 | 2.18E-04 | 7 |

BP, biological process; CC, cellular component; MF, molecular function; Adjusted P, adjusted P-value.

**Supplementary Table 4** KEGG pathway analyses of blue module

| Pathway | ID | Adjusted P | count |
| --- | --- | --- | --- |
| Protein digestion and absorption | hsa04974 | 2.67E-06 | 8 |
| Thyroid hormone signaling pathway | hsa04919 | 1.23E-03 | 6 |

KEGG, Kyoto Encyclopedia of Genes and Genomes; Adjusted P, adjusted P-value.

**Supplementary Table 5** Primer information

| Gene | Forward | Reverse |
| --- | --- | --- |
| FRZB | 5’-CCAAGGGACACCGTCAATCTT-3’ | 5’-CGTTCCTCGTCTTCATAGCCC-3’ |
| COL14A1 | 5’-TTTGGCGGCTGCTTGTTTC-3’ | 5’-CGCTTTTGTTGCAGTGTTCTG-3’ |
| CRISPLD1 | 5’-ACTGGGGAAGATACCGACCC-3’ | 5’-CACCACCTGAGTGTAGTGTGT-3’ |
| LUM | 5’-CTCTTGCCTTGGCATTAGTCG-3’ | 5’-GGTCATCACAGTACATGGCAGT-3’ |
| sFRP4 | 5’-AGAAGGTCCATACAGTGGGAAG-3’ | 5’-GTTACTGCGACTGGTGCGA-3’ |
| ANP | 5’-GCTTCCAGGCCATATTGGAG-3’ | 5’-GGGGGCATGACCTCATCTT-3’ |
| β -Actin | 5’-CGCCACCAGTTCGCCATGGA-3’ | 5’-TACAGCCCGGGGAGCATCGT-3’ |
